# Supplementary material for: Glucosylceramide in cerebrospinal fluid of patients with GBA-associated and idiopathic Parkinson’s disease enrolled in PPMI
Source: PubMed Central journal article supplement (PMC8608962; doi:10.1038/s41531-021-00241-3), 2021-11-22
Supplement: 41531_2021_241_MOESM1_ESM.pdf [file 41531_2021_241_MOESM1_ESM.pdf]

## Supplementary information

### Glucosylceramide in Cerebrospinal Fluid of Patients with *GBA*-associated and Idiopathic Parkinson's Disease enrolled in PPMI

Young Eun Huh<sup>1,2,3,4</sup>, Hyejung Park<sup>5</sup>, Ming Sum Ruby Chiang<sup>7</sup>, Idil Tuncali<sup>1,2,3</sup>, Ganqiang Liu<sup>1,2,3,6</sup>, Joseph J. Locascio<sup>1,2,3,8</sup>, Julia Shirvan<sup>1,8</sup>, Samantha J. Hutten<sup>9</sup>, Melissa S. Rotunno<sup>7</sup>, Catherine Viel<sup>7</sup>, Lamy S. Shihabuddin<sup>7</sup>, Bing Wang<sup>5</sup>, Sergio Pablo Sardi<sup>7</sup> and Clemens R. Scherzer<sup>1,2,3,8</sup>

<sup>1</sup>Center for Advanced Parkinson Research, Harvard Medical School, Brigham & Women's Hospital, Boston, MA 02115, USA

<sup>2</sup>Precision Neurology Program, Harvard Medical School, Brigham & Women's Hospital, Boston, MA 02115, USA

<sup>3</sup>Department of Neurology, Brigham and Women's Hospital, Boston, MA 02115, USA

<sup>4</sup>Department of Neurology, CHA Bundang Medical Center, CHA University, Seongnam-si, Gyeonggi-do, 13496, South Korea

<sup>5</sup>NA Pre-Development Sciences, Sanofi, Waltham, MA 02451, USA

<sup>6</sup>School of Medicine, Sun Yat-sen University, Guangzhou, Guangdong, 510080, China

<sup>7</sup>Rare and Neurologic Diseases Therapeutic Area, Sanofi, Framingham, MA 01701, USA

<sup>8</sup>Department of Neurology, Massachusetts General Hospital, Boston, MA 02114, USA

<sup>9</sup>The Michael J. Fox Foundation for Parkinson's Research, New York, NY 10163, USA

\*Correspondence should be addressed to:

Clemens Scherzer

Center for Advanced Parkinson Research

Harvard Medical School, Brigham & Women's Hospital

Hale Building for Transformative Medicine, Laboratory 9002V

Boston, MA 02115

Phone: 857-307-5422

Fax: 857-307-5476

Email: [cscherzer@rics.bwh.harvard.edu](mailto:cscherzer@rics.bwh.harvard.edu)

## Index

|                                                                                                                                           |    |
|-------------------------------------------------------------------------------------------------------------------------------------------|----|
| Supplementary Figure 1. Flowchart of study participants.....                                                                              | 3  |
| Supplementary Figure 2. Representative chromatograms of lipid extracts.....                                                               | 4  |
| Supplementary Table 1. Baseline characteristics of participants available for longitudinal analysis.....                                  | 5  |
| Supplementary Table 2. The effect of <i>GBA</i> mutation status on the longitudinal change in CSF sphingolipid fractions.....             | 6  |
| Supplementary Table 3. Baseline characteristics of idiopathic PD patients in each quartile of GlcCer/SM ratio measured at enrollment..... | 7  |
| Supplementary Table 4. Association between baseline GlcCer/SM ratio and longitudinal MoCA scores in PD patients.....                      | 8  |
| Supplementary Table 5. Baseline characteristics of GBA-PD patients in each quartile of GlcCer/SM ratio measured at enrollment.....        | 9  |
| Supplementary Table 6. The effect of the baseline GlcCer/SM ratio on the longitudinal change in MoCA scores in GBA-PD patients.....       | 10 |

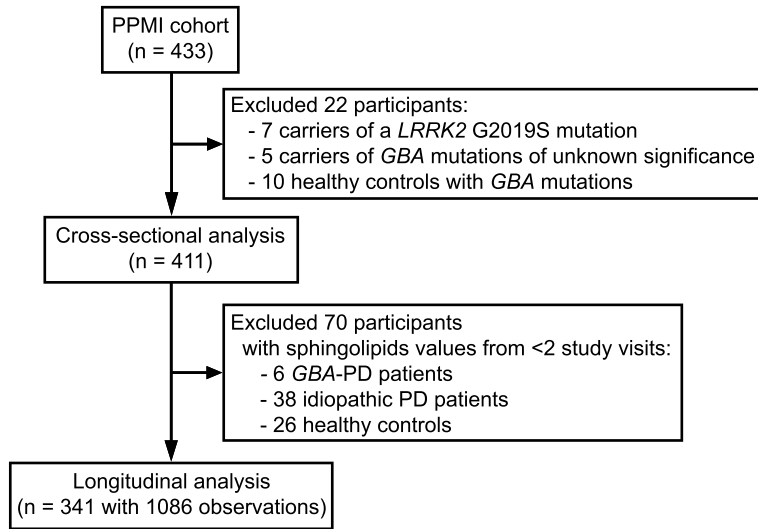

**Supplementary Figure 1. Flowchart of study participants**

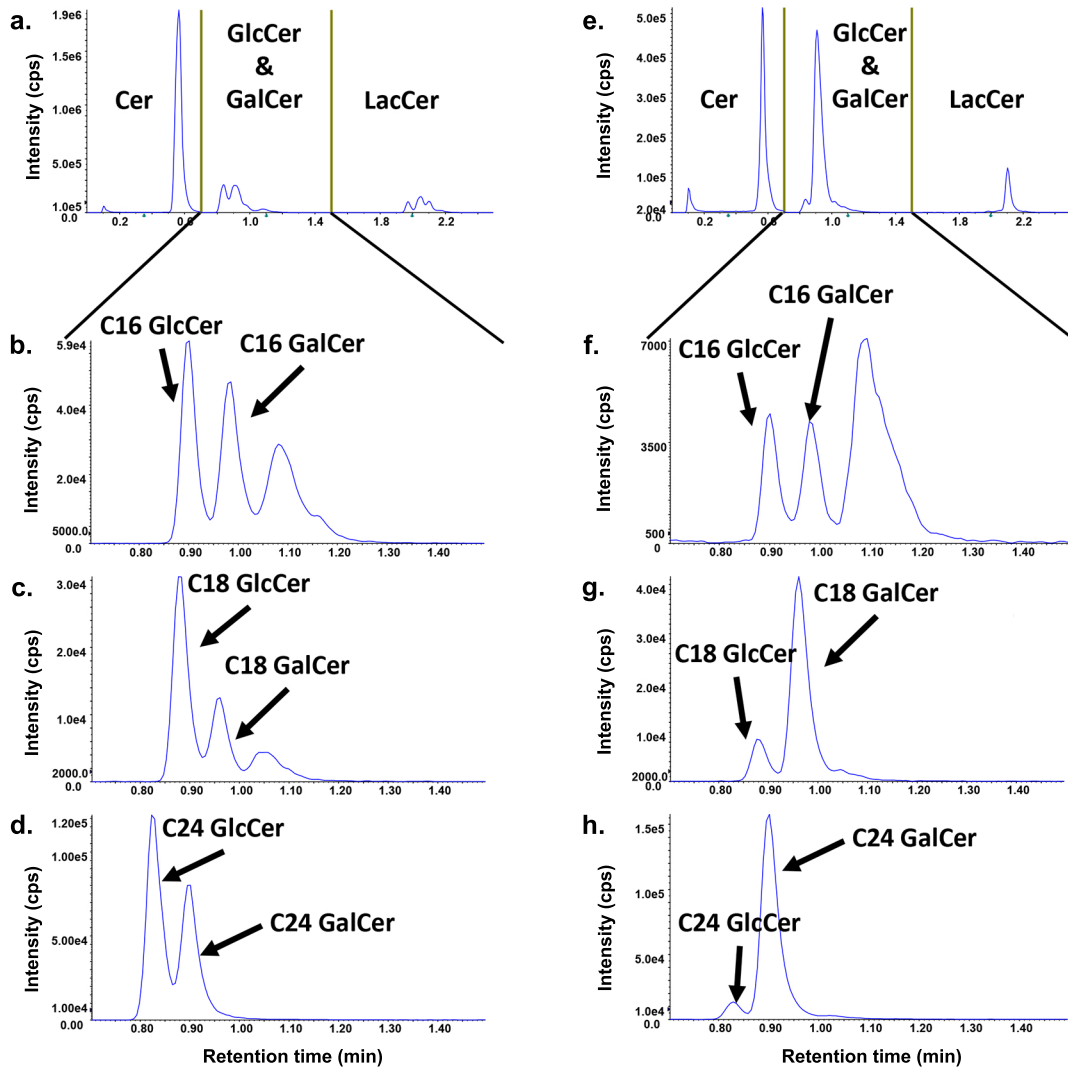

**Supplementary Figure 2. Representative chromatograms of lipid extracts from standards in artificial CSF (a-d) and human CSF (e-h) with ceramides (Cer), glucosylceramides (GlcCer), and lactosylceramides (LacCer) detected by liquid chromatography-tandem mass spectrometry (LC-MS/MS).** Sphingolipids were extracted from artificial CSF or human CSF as described in the methods. Chromatograms (a) and (e) display the total ion intensities for Cer, GlcCer/galactosylceramide (GalCer), and LacCer. Panels b through d and f through h are expanded views of the extracted ion chromatograms for GlcCer and GalCer in artificial and human CSF, respectively. Seven isoforms (C16, C18, C20, C22, C23, C24:1, and C24) of GlcCer and GalCer were analyzed and C16, C18, and C24 isoforms are shown as representatives. (a) Total ion chromatogram of lipid standard extract from artificial CSF. Standard mixtures (Cer, GlcCer, GalCer, and LacCer) were spiked into artificial CSF and extracted by liquid/liquid extraction. The resulting extract was analyzed by LC-MS/MS. Note that standards for GlcCer and GalCer are natural lipid mixture, both of which contain their own fatty acid distribution (See matreya.com for details). (b) Extracted ion chromatogram of C16 GlcCer and C16 GalCer in lipid standard extract from artificial CSF. (c) Extracted ion chromatogram of C18 GlcCer and C18 GalCer in lipid standard extract from artificial CSF. (d) Extracted ion chromatogram of C24 GlcCer and C24 GalCer in lipid standard extract from artificial CSF. (e) Total ion chromatogram of lipid extract from human CSF. Human CSF lipids were extracted by liquid/liquid extraction. The resulting extract was analyzed by LC-MS/MS. (f) Extracted ion chromatogram of C16 GlcCer and C16 GalCer in lipid extract from human CSF. (g) Extracted ion chromatogram of C18 GlcCer and C18 GalCer in lipid extract from human CSF. (h) Extracted ion chromatogram of C24 GlcCer and C24 GalCer in lipid extract from human CSF.

**Supplementary Table 1.** Baseline characteristics of participants available for longitudinal analysis

|                        | HC (n=114)        | Idiopathic PD (n=189) | <i>GBA</i> -PD (n=38)                                                                                                                                                                                                                      | <i>P</i> value |
|------------------------|-------------------|-----------------------|--------------------------------------------------------------------------------------------------------------------------------------------------------------------------------------------------------------------------------------------|----------------|
| Age, y                 | 63.0 (56.3, 70.0) | 65.0 (58.0, 70.0)     | 58.0 (54.0, 64.0)                                                                                                                                                                                                                          | 0.003*‡        |
| Male, n (%)            | 77 (67.5%)        | 124 (65.6%)           | 23 (60.5%)                                                                                                                                                                                                                                 | 0.732          |
| Age at onset, y        | NA                | 65.0 (56.0, 69.0)     | 57.5 (54.0, 64.0)                                                                                                                                                                                                                          | 0.001*         |
| Disease duration, y    | NA                | 1.0 (0.0, 1.0)        | 1.0 (0.0, 1.0)                                                                                                                                                                                                                             | 0.936          |
| MDS-UPDRS III          | 0.0 (0.0, 2.0)    | 21.0 (15.0, 29.0)     | 23.0 (15.3, 27.8)                                                                                                                                                                                                                          | < 0.001†‡      |
| MoCA                   | 28.0 (27.0, 29.0) | 27.0 (26.0, 29.0)     | 28.0 (26.0, 29.0)                                                                                                                                                                                                                          | 0.004†         |
| Years of education     | 16.0 (15.0, 19.0) | 16.0 (14.0, 18.0)     | 16.0 (14.3, 18.0)                                                                                                                                                                                                                          | 0.106          |
| BMI, kg/m <sup>2</sup> | 26.5 (24.1, 29.4) | 26.4 (24.0, 30.1)     | 26.0 (24.3, 29.1)                                                                                                                                                                                                                          | 0.844          |
| Genotypes (n)          | NA                | NA                    | <i>GBA</i> risk variants (26)<br>: E326K (18), T369M (8)<br>Mild <i>GBA</i> mutations (6)<br>: N370S (6)<br>Severe <i>GBA</i> mutations (6)<br>: L444P (1), A456P (1),<br>R463C (1), IVS2+1G>A (1),<br>T369M/R120W (1),<br>N370S/N370S (1) |                |

Values are median (interquartile range) unless otherwise stated.

<sup>a</sup> Kruskal-Wallis, Mann-Whitney, or  $\chi^2$  tests were used as appropriate.

\**P* < 0.05 *GBA*-PD vs idiopathic PD, †*P* < 0.05 idiopathic PD vs HC, ‡ *P* < 0.05 *GBA*-PD vs HC

*BMI* body mass index, *GBA*-PD Parkinson disease patients with a *GBA* mutation, *HC* healthy controls, *Idiopathic PD* Parkinson disease patients without *GBA* mutation, *MoCA* Montreal Cognitive Assessment, *MDS-UPDRS III* Movement Disorder Society-Unified Parkinson Disease Rating Scale part III.

**Supplementary Table 2.** The effect of *GBA* mutation status on the longitudinal change in CSF sphingolipid fractions

| Glucosylceramide                           | $\beta$ -coefficient | Standard error | <i>P</i> value |
|--------------------------------------------|----------------------|----------------|----------------|
| Age at baseline, y                         | 0.004                | 0.002          | 0.006          |
| Group (idiopathic PD)                      | 0.012                | 0.042          | 0.764          |
| Group ( <i>GBA</i> -PD)                    | 0.175                | 0.068          | 0.010          |
| Time in study, y                           | 0.010                | 0.014          | 0.476          |
| Group (idiopathic PD) x time in study, y   | 0.019                | 0.018          | 0.292          |
| Group ( <i>GBA</i> -PD) x time in study, y | -0.042               | 0.027          | 0.120          |
| Sphingomyelin                              | $\beta$ -coefficient | Standard error | <i>P</i> value |
| Group (idiopathic PD)                      | -0.009               | 0.052          | 0.858          |
| Group ( <i>GBA</i> -PD)                    | -0.228               | 0.083          | 0.006          |
| Time in study, y                           | -0.019               | 0.020          | 0.328          |
| Group (idiopathic PD) x time in study, y   | -0.014               | 0.025          | 0.587          |
| Group ( <i>GBA</i> -PD) x time in study, y | 0.060                | 0.038          | 0.111          |
| Ceramide                                   | $\beta$ -coefficient | Standard error | <i>P</i> value |
| Sex (male)                                 | -0.080               | 0.022          | 0.0002         |
| Group (idiopathic PD)                      | -0.002               | 0.028          | 0.932          |
| Group ( <i>GBA</i> -PD)                    | 0.072                | 0.045          | 0.107          |
| Time in study, y                           | 0.010                | 0.013          | 0.411          |
| Group (idiopathic PD) x time in study, y   | -0.006               | 0.016          | 0.694          |
| Group ( <i>GBA</i> -PD) x time in study, y | -0.020               | 0.024          | 0.394          |

*GBA*-PD Parkinson disease patients with a *GBA* mutation, *Idiopathic PD* Parkinson disease patients without *GBA* mutation.

**Supplementary Table 3.** Baseline characteristics of idiopathic PD patients in each quartile of GlcCer/SM ratio measured at enrollment

| Quartile of GlcCer/SM ratio | Quartile 1 (n=48)       | Quartile 2 (n=47)       | Quartile 3 (n=47)       | Quartile 4 (n=47)       | P values |
|-----------------------------|-------------------------|-------------------------|-------------------------|-------------------------|----------|
| Range of GlcCer/SM ratio    | 0.011 - 0.032           | 0.008 - 0.011           | 0.006 - 0.007           | 0.001 - 0.006           |          |
| Age, y                      | 66.00<br>(58.75, 70.25) | 66.00<br>(60.00, 71.50) | 64.00<br>(58.00, 71.00) | 63.00<br>(55.50, 68.00) | 0.492    |
| Male, n (%)                 | 32 (66.7%)              | 30 (63.8%)              | 30 (63.8%)              | 32 (68.1%)              | 0.963    |
| Age at onset, y             | 65.50<br>(58.50, 69.25) | 65.00<br>(58.50, 70.00) | 63.00<br>(55.00, 70.00) | 63.00<br>(55.00, 67.00) | 0.545    |
| Disease duration, y         | 1.00<br>(0.00, 1.25)    | 1.00<br>(0.00, 1.50)    | 1.00<br>(0.00, 1.00)    | 1.00<br>(0.00, 1.00)    | 0.674    |
| MDS-UPDRS III               | 23.50<br>(16.00, 31.00) | 20.00<br>(13.00, 23.50) | 20.00<br>(15.00, 27.00) | 20.00<br>(16.00, 26.00) | 0.083    |
| MoCA                        | 27.00<br>(25.00, 28.00) | 28.00<br>(26.50, 29.00) | 27.00<br>(26.00, 28.00) | 28.00<br>(26.00, 29.00) | 0.067    |
| Years of education          | 15.50<br>(14.00, 17.00) | 16.00<br>(15.00, 18.00) | 16.00<br>(14.00, 18.00) | 16.00<br>(14.00, 18.00) | 0.118    |
| BMI, kg/m <sup>2</sup>      | 26.23<br>(23.44, 30.32) | 26.56<br>(24.41, 30.19) | 25.69<br>(23.78, 30.10) | 26.98<br>(24.43, 28.75) | 0.791    |

Values are median (interquartile range) unless otherwise stated.

Kruskal-Wallis or  $\chi^2$  tests were used as appropriate.

*BMI* body mass index, *GlcCer/SM ratio* the ratio of glucosylceramide to sphingomyelin in the cerebrospinal fluid, *Idiopathic PD* = Parkinson disease patients without *GBA* mutation, *MoCA* Montreal Cognitive Assessment, *MDS-UPDRS III* Movement Disorder Society-Unified Parkinson Disease Rating Scale part III.

**Supplementary Table 4.** Association between baseline GlcCer/SM ratio and longitudinal MoCA scores in PD patients

|                                                                                                      | $\beta$ -coefficient | Standard error | <i>P</i> value |
|------------------------------------------------------------------------------------------------------|----------------------|----------------|----------------|
| Age at baseline, y                                                                                   | -0.05587             | 0.02154        | 0.011          |
| Sex (male)                                                                                           | -1.26377             | 0.46624        | 0.008          |
| Age at baseline x time in study, y                                                                   | -0.02046             | 0.01112        | 0.069          |
| Group (idiopathic PD patient in the highest quartile of baseline GlcCer/SM ratio)                    | -0.9056              | 0.43701        | 0.041          |
| Time in study, y                                                                                     | 1.00457              | 0.7085         | 0.159          |
| Group (idiopathic PD patient in the highest quartile of baseline GlcCer/SM ratio) x time in study, y | -0.46126             | 0.22149        | 0.036          |

*GlcCer/SM ratio* the ratio of glucosylceramide to sphingomyelin in the cerebrospinal fluid, *Idiopathic PD* = Parkinson disease patients without *GBA* mutation.



**Supplementary Table 5.** Baseline characteristics of *GBA*-PD patients in each quartile of GlcCer/SM ratio measured at enrollment

| Quartile of GlcCer/SM ratio | Quartile 1 (n=10)    | Quartile 2 (n=9)     | Quartile 3 (n=9)     | Quartile 4 (n=10)    | <i>P</i> value |
|-----------------------------|----------------------|----------------------|----------------------|----------------------|----------------|
| Range of GlcCer/SM ratio    | 0.011 - 0.030        | 0.009 - 0.011        | 0.007 - 0.009        | 0.003 - 0.007        |                |
| Age, y                      | 65.0<br>(61.8, 69.8) | 58.0<br>(55.0, 64.0) | 55.0<br>(49.0, 59.0) | 56.0<br>(51.8, 60.0) | 0.029          |
| Male, n (%)                 | 5 (50.0%)            | 8 (88.9%)            | 4 (44.4%)            | 6 (60.0%)            | 0.215          |
| Age at onset, y             | 64.0<br>(59.5, 68.5) | 57.0<br>(54.0, 63.0) | 54.0<br>(47.0, 59.0) | 55.0<br>(51.8, 59.0) | 0.037          |
| Disease duration, y         | 1.0<br>(1.0, 1.8)    | 1.0<br>(0.0, 1.0)    | 0.0<br>(0.0, 1.0)    | 1.0<br>(0.0, 1.0)    | 0.299          |
| MDS-UPDRS III               | 23.0<br>(16.3, 27.8) | 25.0<br>(17.0, 30.0) | 21.0<br>(16.0, 25.0) | 17.0<br>(11.3, 25.3) | 0.562          |
| MoCA                        | 26.0<br>(25.3, 29.0) | 27.0<br>(26.0, 28.0) | 29.0<br>(26.0, 29.0) | 28.0<br>(25.5, 28.0) | 0.587          |
| Years of education          | 16.0<br>(14.3, 17.0) | 16.0<br>(16.0, 18.0) | 16.0<br>(15.0, 18.0) | 16.0<br>(14.5, 16.0) | 0.689          |
| BMI, kg/m <sup>2</sup>      | 26.8<br>(23.8, 28.8) | 26.0<br>(24.1, 26.7) | 24.7<br>(24.4, 27.0) | 27.4<br>(24.6, 29.3) | 0.851          |

Values are median (interquartile range) unless otherwise stated.

Kruskal-Wallis or  $\chi^2$  tests were used as appropriate.

*BMI* body mass index, *GlcCer/SM ratio* the ratio of glucosylceramide to sphingomyelin in the cerebrospinal fluid, *GBA-PD* = Parkinson disease patients with a *GBA* mutation, *MoCA* Montreal Cognitive Assessment, *MDS-UPDRS III* Movement Disorder Society-Unified Parkinson Disease Rating Scale part III.

**Supplementary Table 6.** The effect of the baseline GlcCer/SM ratio on the longitudinal change in MoCA scores in *GBA*-PD patients

|                                                                                                        | $\beta$ -coefficient | Standard error | <i>P</i> value |
|--------------------------------------------------------------------------------------------------------|----------------------|----------------|----------------|
| Age at baseline, y                                                                                     | -0.837               | 0.346          | 0.024          |
| Sex (male)                                                                                             | -1.394               | 0.494          | 0.010          |
| Age at onset, y                                                                                        | 0.754                | 0.338          | 0.036          |
| Group ( <i>GBA</i> -PD patient in the highest quartile of baseline GlcCer/SM ratio)                    | 0.659                | 0.712          | 0.359          |
| Time in study, y                                                                                       | 0.238                | 0.306          | 0.448          |
| Group ( <i>GBA</i> -PD patient in the highest quartile of baseline GlcCer/SM ratio) x time in study, y | -1.102               | 0.466          | 0.029          |

*GlcCer/SM ratio* the ratio of glucosylceramide to sphingomyelin in the cerebrospinal fluid, *GBA-PD* = Parkinson disease patients with a *GBA* mutation.
